# Supplementary material
Source: publisher site journal article supplement (https://www.dovepress.com/article/346745)

# Supplementary

**Supplementary table 1.** ICD-10 codes for Charlson comorbidity index

| **Diseases** | **ICD-10** | **Weight** |
| --- | --- | --- |
| Myocardial infarction | I21;I22;I23 | 1 |
| Congestive heart failure | I50; I11.0; I13.0; I13.2 | 1 |
| Peripheral vascular disease | I70; I71; I72; I73; I74; I77 | 1 |
| Cerebrovascular disease | I60-I69; G45; G46 | 1 |
| Dementia | F00-F03; F05.1; G30 | 1 |
| Chronic pulmonary disease | J40-J47; J60-J67; J68.4; J70.1; J70.3; J84.1; J92.0; J96.1; J98.2; J98.3 | 1 |
| Rheumatic disease | M05; M06; M08; M09;M30;M31; M32; M33; M34; M35; M36; D86 | 1 |
| Peptic ulcer disease | K22.1; K25-K28 | 1 |
| Mild liver disease | B18; K70.0-K70.3; K70.9; K71; K73; K74; K76.0 | 1 |
| Diabetes Type 1 &2 | E10.0, E10.1; E10.9, E11.0; E11.1; E11.9 | 1 |
| Diabetes with chronic complication | E10.2-E10.8 E11.2-E11.8 | 2 |
| Hemiplegia or paraplegia | G81; G82 | 2 |
| Renal disease | I12, I13, N00-N05, N07, N11; N14; N17-N19; Q61 | 2 |
| Any tumor | C00-C75 | 2 |
| Leukemia | C91-C95 | 2 |
| Lymphoma | C81-C85; C88; C90; C96 | 2 |
| Moderate or severe liver disease | B15.0, B16.0, B16.2, B19.0; K70.4; K72; K76.6; I85 | 3 |
| Mestastatic solid tumor | C76-C80 | 6 |
| AIDS/HIV | B21-B24 | 6 |

**Supplementary table 2.** ICD-10 codes for Elixhauser comorbidity index

| **Disease** | **ICD-10** | **Weight** |
| --- | --- | --- |
| Congestive heart failure | I09.9, I11.0, I13.0, I13.2, I25.5, I42.0, I42.5 - I42.9, I43.x, I50.x, P29.0 | 7 |
| Cardiac arrhythmias | I44.1 - I44.3, I45.6, I45.9, I47.x - I49.x, R00.0, R00.1, R00.8, T82.1, Z45.0, Z95.0 | 5 |
| Valvular disease | A52.0, I05.x - I08.x, I09.1, I09.8, I34.x - I39.x, Q23.0 - Q23.3, Z95.2 - Z95.4 | -1 |
|  |
| Pulmonary circulation disorders | I26.x, I27.x, I28.0, I28.8, I28.9 | 4 |
| Peripheral vascular disorders | I70.x, I71.x, I73.1, I73.8, I73.9, I77.1, I79.0, I79.2, K55.1, K55.8, K55.9, Z95.8, Z95.9 | 2 |
| Hypertension | I10.x, I11.x - I13.x, I15.x | 0 |
|  |
| Paralysis | G04.1, G11.4, G80.1, G80.2, G81.x, G82.x, G83.0 - G83.4, G83.9 | 7 |
| Other neurological disorders | G10.x - G13.x, G20.x - G22.x, G25.4, G25.5, G31.2, G31.8, G31.9, G32.x, G35.x - G37.x, G40.x, G41.x, G93.1, G93.4, R47.0, R56.x | 6 |
| Chronic pulmonary disease | I27.8, I27.9, J40.x - J47.x, J60.x - J67.x, J68.4, J70.1, J70.3 | 3 |
| Diabetes, uncomplicated | E10.0, E10.1, E10.9, E11.0, E11.1, E11.9, E12.0, E12.1, E12.9, E13.0, E13.1, E13.9, E14.0, E14.1, E14.9 | 0 |
| Diabetes, complicated | E10.2 - E10.8, E11.2 - E11.8, E12.2 - E12.8, E13.2 - E13.8, E14.2 - E14.8 | 0 |
| Hypothyroidism | E00.x - E03.x, E89.0 | 0 |
| Renal failure | I12.0, I13.1, N18.x, N19.x, N25.0, Z49.0 - Z49.2, Z94.0, Z99.2 | 5 |
| Liver disease | B18.x, I85.x, I86.4, I98.2, K70.x, K71.1, K71.3 - K71.5, K71.7, K72.x - K74.x, K76.0, K76.2 - K76.9, Z94.4 | 11 |
| Peptic ulcer disease, no bleeding | K25.7, K25.9, K26.7, K26.9, K27.7, K27.9, K28.7, K28.9 | 0 |
| AIDS/HIV | B20.x - B22.x, B24.x | 0 |
| Lymphoma | C81.x - C85.x, C88.x, C96.x, C90.0, C90.2 | 9 |
| Metastatic cancer | C77.x - C80.x | 12 |
| Solid tumor without metastasis | C00.x - C26.x, C30.x - C34.x, C37.x - C41.x, C43.x, C45.x - C58.x, C60.x - C76.x, C97.x | 4 |
| Rheumatoid arthritis/collagen vascular diseases | L94.0, L94.1, L94.3, M05.x, M06.x, M08.x, M12.0, M12.3, M30.x, M31.0 - M31.3, M32.x - M35.x, M45.x, M46.1, M46.8, M46.9 | 0 |
| Coagulopathy | D65 - D68.x, D69.1, D69.3 - D69.6 | 3 |
| Obesity | E66.x | -4 |
| Weight loss | E40.x - E46.x, R63.4, R64 | 6 |
| Fluid and electrolyte disorders | E22.2, E86.x, E87.x | 5 |
| Blood loss anemia | D50.0 | -2 |
| Deficiency anemia | D50.8, D50.9, D51.x - D53.x | -2 |
| Alcohol abuse | F10, E52, G62.1, I42.6, K29.2, K70.0, K70.3, K70.9, T51.x, Z50.2, Z71.4, Z72.1 | 0 |
| Drug abuse | F11.x - F16.x, F18.x, F19.x, Z71.5, Z72.2 | -7 |
| Psychosis | F20.x, F22.x - F25.x, F28.x, F29.x, F30.2, F31.2, F31.5 | 0 |
| Depression | F20.4, F31.3 - F31.5, F32.x, F33.x, F34.1, F41.2, F43.2 | -3 |

**Supplementary table 3.** ATC codes for Rx-risk index

| **Disease** | **ATC-codes** | **Weight** |
| --- | --- | --- |
| Alcohol dependency | N07BB01-N07BB99 | 6 |
| Allergies | R01AC01-R01AD60,R06AD02-R06AX27, R06AB04 | -1 |
| Anticoagulants | B01AA03-B01AB06, B01AE07, B01AF01, B01AF02, B01AX05 | 1 |
| Antiplatelets | B01AC04-B01AC30 | 2 |
| Anxiety | N05BA01-N05BA12, N05BE01 | 1 |
| Arrhythmia | C01AA05, C01BA01-C01BD01, C07AA07 | 2 |
| Benign prostatic hyperplasia | G04CA01-G04CA99, G04CB01, G04CB02* | 0 |
| Bipolar disorder | N05AN01 | -1 |
| Chronic airways disease | R03AC02-R03DC03, R03DX05 | 2 |
| Congestive heart failure | C03DA02-C03DA99, | 2 |
| C07AB07, C07AG02, C07AB12, (C03CA01-C03CC01 and C09AA01-C09AX99, C09CA01-C09CX99)† | 2 |
| Dementia | N06DA02-N06DA04, N06DX01 | 2 |
| Depression | N06AA01–N06AG02, N06AX03–N06AX11, N06AX13–N06AX18, N06AX21–N06AX26 | 2 |
| Diabetes | A10AA01–A10BX99 | 2 |
| Epilepsy | N03AA01–N03AX99 | 0 |
| Glaucoma | S01EA01–S01EB03, S01EC03–S01EX99 | 0 |
| Gastroesophageal reflux disease | A02BA01–A02BX05 | 0 |
| Gout | M04AA01–M04AC01 | 1 |
| HIV | J05AE01–J05AE10, J05AF12–J05AG05, J05AR01–J05AR99, J05AX07–J05AX09, J05AX12, J05AF01–J05AF07, J05AF09 | 0 |
| Hyperkalaemia | V03AE01 | 4 |
| Hyperlipidaemia | A10BH03‡, C10AA01–C10BX09 | -1 |
| Hypertension | C03AA01–C03BA11, C03DB01, C03DB99, C03EA01, C09BA02–C09BA09, C09DA02– C09DA08, C02AB01–C02AC05, C02DB02– C02DB99 (C03CA01–C03CCO1 or C09CA01– C09CX99)§ | 2 |
| Hyperthyroidism | H03BA02, H03BB01 | 0 |
| Hypothyroidism | H03AA01–H03AA02 | 0 |
| Irritable bowel syndrome | A07EC01–A07EC04, A07EA01–A07EA02, A07EA06, L04AA33 | 2 |
| Ischaemic heart disease angina | C01DA02–C01DA14, C01DX16, C08EX02 | -1 |
| Ischaemic heart disease hypertension | C07AA01–C07AA06, C07AA08–C07AB01, C07AB02, | 0 |
| C07AG01, C08CA01–C08DB01, C09DB01–C09DB04, C09DX01, C09BB02–C09BB10, C07AB03, C09DX03, C10BX03** | -1 |
| Incontinence | G04BD01–G04BD99 | 0 |
| Inflammation/pain | M01AB01–M01AH06 | -1 |
| Liver failure | A06AD11, A07AA11 | 3 |
| Malignancies | L01AA01–L01XX41 | 2 |
| Malnutrition | B05BA01–B05BA10 | 0 |
| Migraine | N02CA01–N02CX01 | -1 |
| Osteoporosis/Paget’s disease | M05BA01–M05BB05, M05BX03, M05BX04, G03XC01, H05AA02 | -1 |
| Pain | N02AA01–N02AX02, N02AX06, N02AX52, N02BE51 | 3 |
| Pancreatic insufficiency | A09AA02 | 0 |
| Parkinson´s disease | N04AA01–N04BX02 | 3 |
| Psoriasis | D05AA01–D05AA99, D05BB01 D05BB02, D05AX02, D05AC01–D05AC51, D05AX52 | 0 |
| Psychotic illness | N05AA01–N05AB02, N05AB06–N05AL07, N05AX07–N05AX13 | 6 |
| Pulmonary hypertension | C02KX01–C02KX05 | 6 |
| Renal disease | B03XA01–B03XA03, A11CC01–A11CC04, V03AE02, V03AE03, V03AE05 | 6 |
| Smoking cessation | N07BA01–N07BA03, N06AX12 | 6 |
| Steroid-responsive disease | H02AB01–H02AB10 | 2 |
| Transplant | L04AA06, L04AA10, L04AA18, L04AD01, L04AD02 | 0 |
| *Benign prostatic hyperplasia medicines are tested for sex —must be male. Females suffering from bladder obstructions can be prescribed medicines used to treat benign prostatic hyperplasia.  †Must have at least two medicines prescribed with one of those medicines having an ATC code from C03CA01–C03CC01 and the other having an ATC code from either C09AA01–C09AX99 or C09CA01–C09CX99.  ‡Combination product for hyperlipidaemia and diabetes.  §Can have medicine dispensed with an ATC code C03CA01–C03CC01 or C09AA01–C09AX99, but not both, as this would indicate chronic heart failure  **Combination product for hyperlipidaemia and ischaemic heart disease: hypertension. | | |

**Supplementary Figure 1**. Calibration plots with 10-percentiles for 30-day mortality

**Supplementary Figure 2**. Calibration plots with 10-percentiles for 1-year mortality


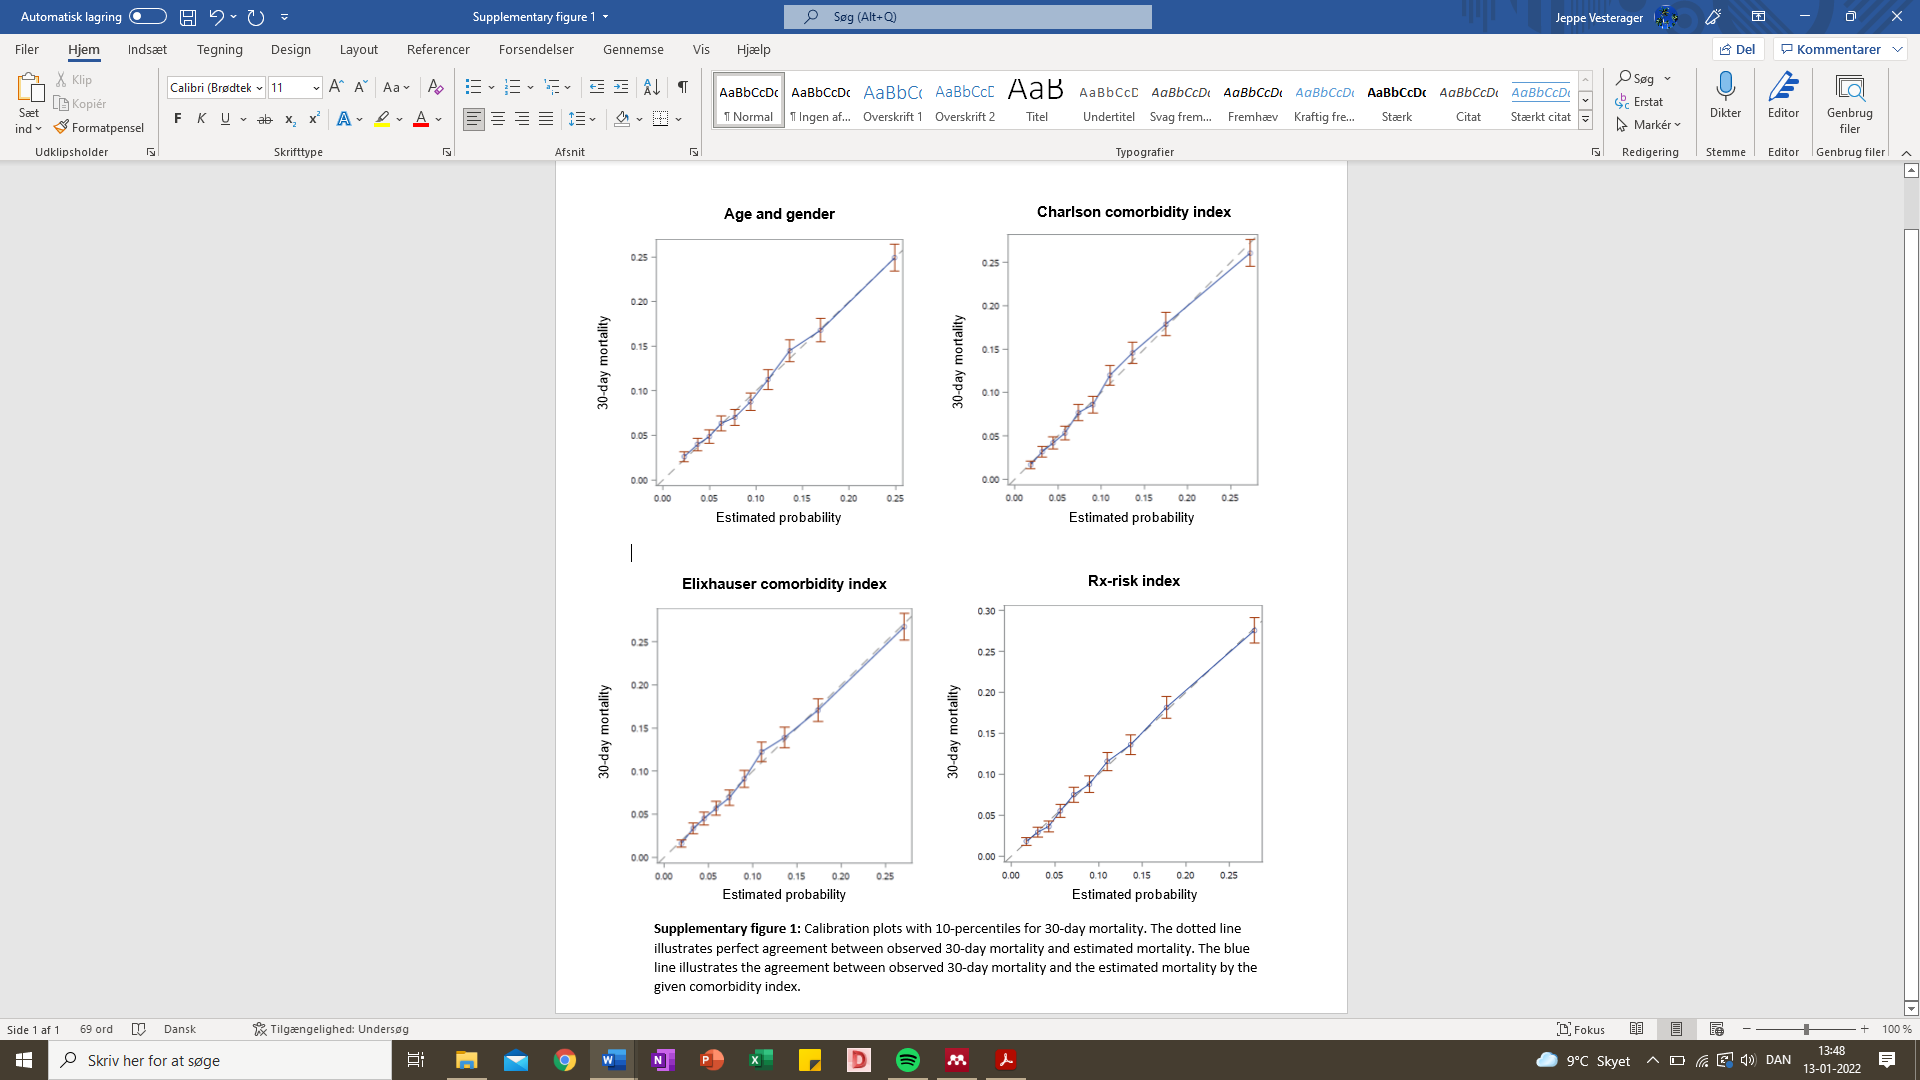


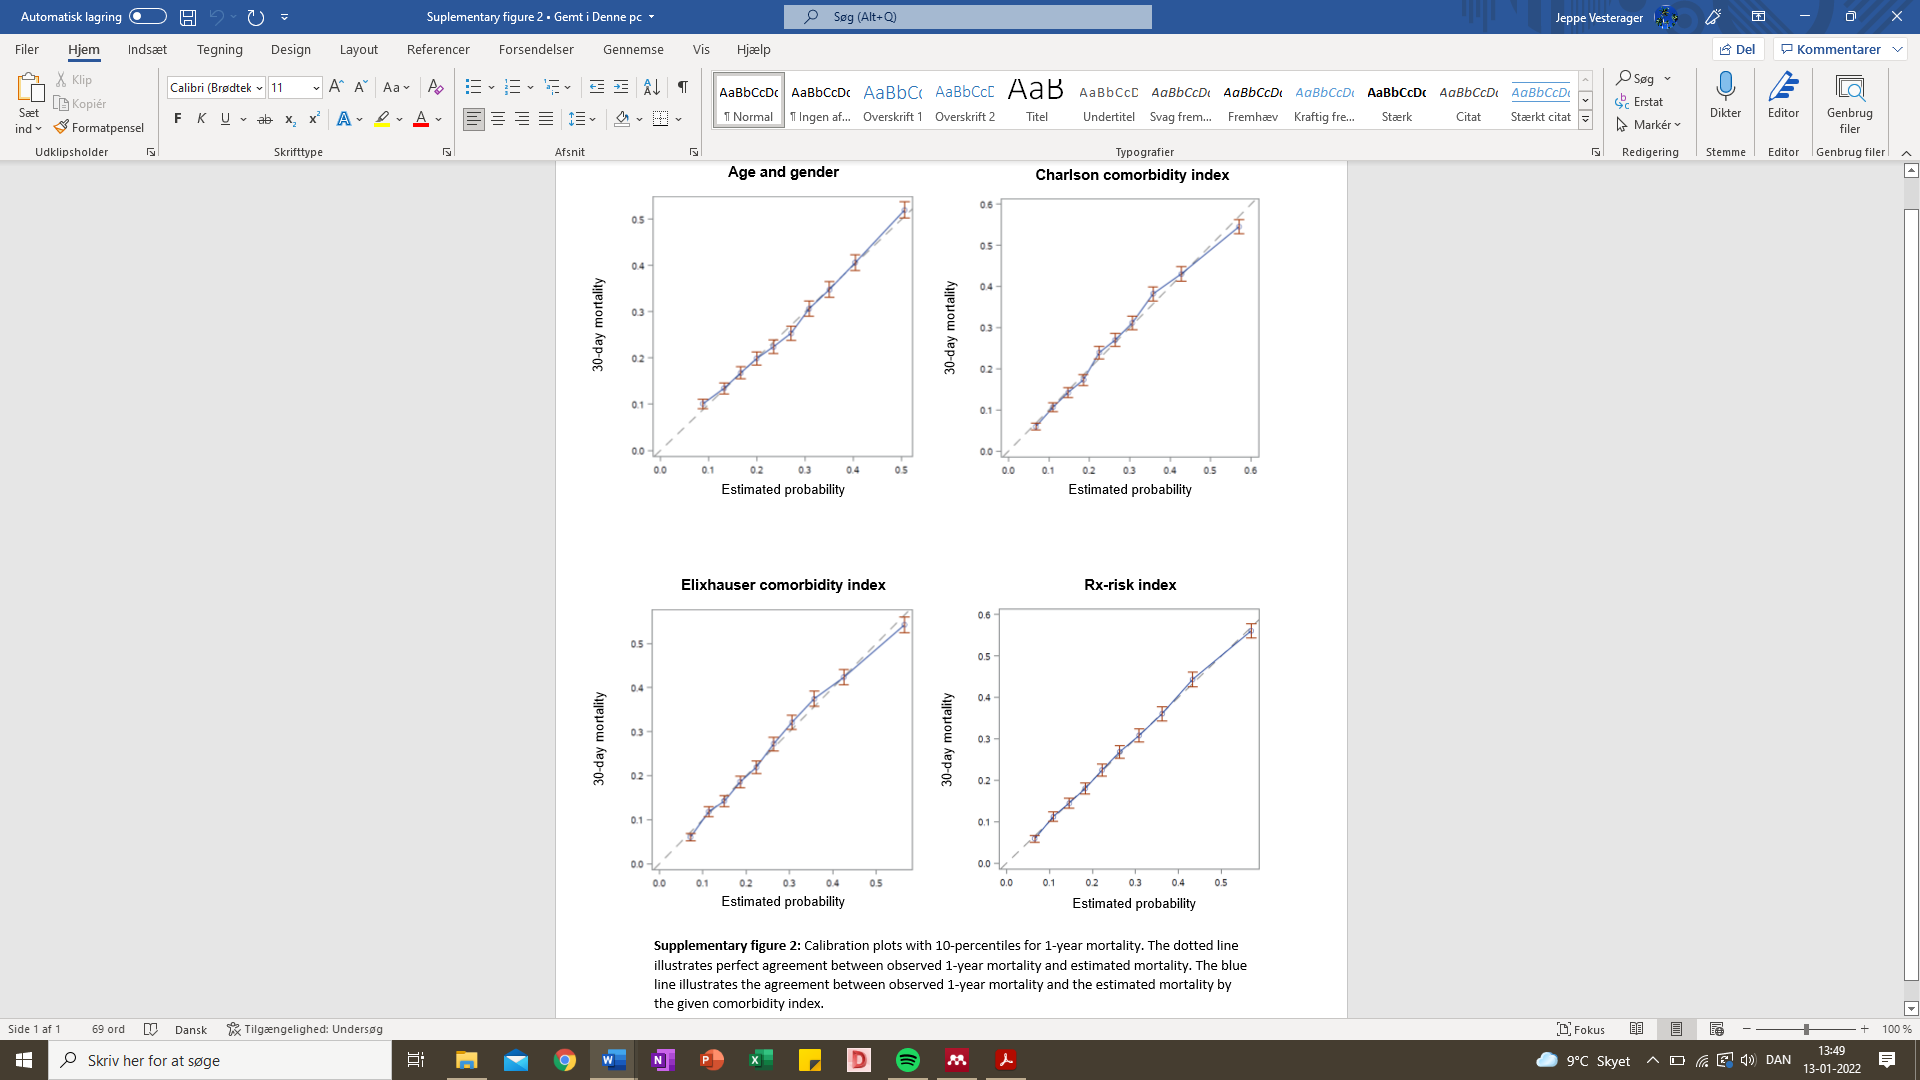

Supplement: Supplementary file 1 [file get_supplementary_file.php]
